# Supplementary material
Source: PubMed Central journal article supplement (PMC4213610)
Supplement: rspb20140888supp6.pdf [file rspb20140888supp6.pdf]

| Species (accepted names)                                    | Hypanthium length (mm) | Flower Color   | Pollinator coding       | Basis for the pollinator coding                                                                                                                                                                          | Reference for morphological traits  |
|-------------------------------------------------------------|------------------------|----------------|-------------------------|----------------------------------------------------------------------------------------------------------------------------------------------------------------------------------------------------------|-------------------------------------|
| <i>Passiflora adullerina</i> L. f.                          | 77                     | Rose           | Ensifera                | Other hummingbirds (including <i>Ensifera</i> as main pollinator, others thought to be illegitimate Gutierrez et al. 2008)                                                                               | Escobar 1988                        |
| <i>Passiflora amazonica</i> L.K. Escobar                    | 65                     | Pink           | Ensifera                | Pollination by <i>Ensifera</i> based on flower color and hypanthium length (>60 mm)                                                                                                                      | Escobar 1989                        |
| <i>Passiflora ampullacea</i> (Mast.) Harms                  | 75                     | Whitish-green  | Ensifera                | P.M. Jørgensen indicates hummingbird pollination from L.K. Escobar pers. Com ( <a href="http://www.passionflow.co.uk">www.passionflow.co.uk</a> ).                                                       | Holm-Nielsen et al. 1988            |
| <i>Passiflora anastomosans</i> (Lamb.) Killip               | 85                     | Pink           | Ensifera                | Pollination by <i>Ensifera</i> based on flower color and hypanthium length (<60 mm)                                                                                                                      | Killip 1938                         |
| <i>Passiflora andina</i> Killip                             | 75                     | Whitish-green  | Bat                     | Pollination by bats based on flower color                                                                                                                                                                | Killip 1938                         |
| <i>Passiflora antioquiensis</i> Karst.                      | 32                     | Pink           | Other hummingbird       | Pollination by hummingbirds based on flower color and hypanthium length                                                                                                                                  | Escobar 1988                        |
| <i>Passiflora bracteosa</i> Planch. & Lindl.                | 80                     | Pink           | Ensifera                | Pollination by <i>Ensifera</i> based on flower color and hypanthium length (>60 mm)                                                                                                                      | Escobar 1988                        |
| <i>Passiflora coactilis</i> (Mast.) Killip                  | 87                     | Red            | Ensifera                | Pollination by <i>Ensifera</i> based on flower color and hypanthium length (<60 mm)                                                                                                                      | Holm-Nielsen et al. 1988            |
| <i>Passiflora cremastantha</i> Harms                        | 45                     | Pink           | Other hummingbird       | Pollination by hummingbirds based on color and hypanthium length                                                                                                                                         | Escobar 1988                        |
| <i>Passiflora crispolanata</i> L. Uribe                     | 73                     | Pink           | Ensifera                | Pollination by <i>Ensifera</i> based on flower color and hypanthium length (>60 mm)                                                                                                                      | Escobar 1988                        |
| <i>Passiflora cumbalensis</i> (Karst.) Harms                | 90                     | Pink           | Ensifera                | Pollination by <i>Ensifera</i> based on flower color and hypanthium length (<60 mm)                                                                                                                      | Holm-Nielsen et al. 1988            |
| <i>Passiflora fimbriatistipula</i> Harms                    | 75                     | Rose           | Ensifera                | Pollination by <i>Ensifera</i> based on flower color and hypanthium length (<60 mm)                                                                                                                      | Escobar 1988                        |
| <i>Passiflora flexipes</i> Tr. & Planch.                    | 80                     | Pink           | Ensifera                | Pollination by <i>Ensifera</i> based on flower color and hypanthium length (>60 mm)                                                                                                                      | Escobar 1988                        |
| <i>Passiflora formosa</i> Ulmer                             | 87                     | Pink           | Ensifera                | Pollination by <i>Ensifera</i> based on flower color and hypanthium length (<60 mm)                                                                                                                      | Ulmer 1999                          |
| <i>Passiflora graciliens</i> (Gray) Harms                   | 17                     | Pink           | Other hummingbird       | Pollination by hummingbirds based on flower color and hypanthium length                                                                                                                                  | Killip 1938                         |
| <i>Passiflora harlingii</i> Holm-Nielsen                    | 140                    | Pink           | Ensifera                | Pollination by <i>Ensifera</i> based on flower color and hypanthium length (>60 mm)                                                                                                                      | Holm-Nielsen 1974                   |
| <i>Passiflora insignis</i> (Mast.) Hook.                    | 30                     | Pink           | Other hummingbird       | Hummingbird pollination based on flower color and hypanthium length                                                                                                                                      | Jørgensen & Vasquez 2009            |
| <i>Passiflora jamesonii</i> (Mast.) Bailey                  | 93                     | Pink           | Ensifera                | Pollination by <i>Ensifera</i> based on flower color and hypanthium length (<60 mm)                                                                                                                      | Holm-Nielsen et al. 1988            |
| <i>Passiflora lanata</i> (Juss.) Poir.                      | 77                     | Rose           | Ensifera                | Pollination by <i>Ensifera</i> based on flower color and hypanthium length (>60 mm)                                                                                                                      | Escobar 1988                        |
| <i>Passiflora leptomischia</i> Harms                        | 75                     | Rose           | Ensifera                | Pollination by <i>Ensifera</i> based on flower color and hypanthium length (<60 mm)                                                                                                                      | Escobar 1988                        |
| <i>Passiflora linda</i> Panero                              | 23                     | Red            | Other hummingbird       | Pollination by hummingbirds based on flower color and hypanthium length                                                                                                                                  | Jørgensen & MacDougal 1997          |
| <i>Passiflora loxensis</i> Killip                           | 87                     | Pink           | Ensifera                | Pollination by <i>Ensifera</i> based on flower color and hypanthium length (>60 mm)                                                                                                                      | Holm-Nielsen 1974                   |
| <i>Passiflora luzmarina</i> Jørgensen                       | 21.5                   | Pink           | Other hummingbird       | Pollination by hummingbirds based on flower color and hypanthium length                                                                                                                                  | Jørgensen & MacDougal 1997          |
| <i>Passiflora macropoda</i> Killip                          | 20                     | Pale           | Bat                     | Assumed bat pollinated but observations lacking (Jørgensen et al. 2012)                                                                                                                                  | Killip 1960                         |
| <i>Passiflora mandonii</i> (Mast.) Killip                   | 53                     | Rose           | Other hummingbird       | Pollination by hummingbirds based on flower color and hypanthium length                                                                                                                                  | Jørgensen & Vasquez 2009            |
| <i>Passiflora manicata</i> (Juss.) Pers.                    | 20                     | Red            | Other hummingbird       | Pollination by hummingbirds based on flower color and hypanthium length                                                                                                                                  | Escobar 1988                        |
| <i>Passiflora mathewsii</i> (Mast.) Killip                  | 40                     | Rose           | Other hummingbird       | Pollination by hummingbirds based on flower color and hypanthium length                                                                                                                                  | Holm-Nielsen et al. 1988            |
| <i>Passiflora mixta</i> L. f.                               | 95                     | Pink           | Ensifera                | Pollination by <i>Ensifera</i> observed by Lindberg & Olesen (2001)                                                                                                                                      | Holm-Nielsen et al. 1988            |
| <i>Passiflora parritae</i> (Mast.) Bailey                   | 76                     | Rose           | Ensifera                | Pollination by <i>Ensifera</i> based on flower color and hypanthium length (>60 mm)                                                                                                                      | Escobar 1988                        |
| <i>Passiflora peduncularis</i> Cav.                         | 17                     | Pale           | Bat                     | Assumed bat pollinated but observations lacking (Jørgensen et al. 2012)                                                                                                                                  | Killip 1938                         |
| <i>Passiflora pilosicorona</i> Sacco                        | 20                     | Pink           | Hummingbird             | Pollination by hummingbirds based on flower color and hypanthium length                                                                                                                                  | Jørgensen & Vasquez 2009            |
| <i>Passiflora pinnatistipula</i> Cav.                       | 52                     | Pink           | Hummingbird             | Pollination by hummingbirds based on flower color and hypanthium length                                                                                                                                  | Jørgensen & Vasquez 2009            |
| <i>Passiflora quindensis</i> Killip                         | 83.5                   | Rose           | Ensifera                | Pollination by <i>Ensifera</i> based on flower color and hypanthium length (<60 mm)                                                                                                                      | Escobar 1988                        |
| <i>Passiflora roseorum</i> Killip                           | 75                     | Rose           | Ensifera                | Pollination by <i>Ensifera</i> based on flower color and hypanthium length (>60 mm)                                                                                                                      | Killip 1938                         |
| <i>Passiflora rugosa</i> (Mast.) Tr. & Planch.              | 80                     | Rose           | Ensifera                | Pollination by hummingbirds based on color and hypanthium length (Escobar 1988)                                                                                                                          | Escobar 1988                        |
| <i>Passiflora sanctae-barbarae</i> Holm-Nielsen & Jørgensen | 82                     | Pink           | Ensifera                | Pollination by <i>Ensifera</i> based on flower color and hypanthium length (<60 mm)                                                                                                                      | Jørgensen et al. 1987               |
| <i>Passiflora tarminiana</i> Coppens & V. Barney            | 70                     | Pink           | Ensifera                | Pollination by <i>Ensifera</i> based on flower color and hypanthium length (>60 mm)                                                                                                                      | Coppens d' Eeckenbrugge et al. 2001 |
| <i>Passiflora trifoliata</i> Cav.                           | 35                     | Pink           | Other hummingbird       | Pollination by hummingbirds based on flower color and hypanthium length                                                                                                                                  | Killip 1938                         |
| <i>Passiflora tripartita</i> (Juss.) Poir.                  | 85                     | Pink           | Ensifera                | Pollination by <i>Ensifera</i> based on flower color and hypanthium length (<60 mm)                                                                                                                      | Holm-Nielsen et al. 1988            |
| <i>Passiflora trisecta</i> Mast.                            | 12.5                   | Whitish-green  | Bat                     | Machhala, pers obs. (in Jørgensen et al. 2012)                                                                                                                                                           | Killip 1938                         |
| <i>Passiflora weigendii</i> Ulmer                           | 77.5                   | Pink           | Ensifera                | Pollination by <i>Ensifera</i> based on flower color and hypanthium length (>60 mm)                                                                                                                      | Ulmer & Schwerdtfeger 2000          |
| <i>Passiflora zamarana</i> Killip                           | 75                     | Rose           | Ensifera                | Pollination by <i>Ensifera</i> based on flower color and hypanthium length (>60 mm)                                                                                                                      | Holm-Nielsen et al. 1988            |
| <i>Passiflora murucuja</i> L.                               | 6                      | Red            | Hummingbird             | Observed by E. Kay ( <a href="http://www.usln.edu/services/kellogg/people/kay/html">www.usln.edu/services/kellogg/people/kay/html</a> )                                                                  | Killip 1938                         |
| <i>Passiflora misera</i> Kunth                              | <10                    | Purplish-white | <i>Ptiloglossa</i> bee? | Pollination observed by Garca Amela, M.T. 2001                                                                                                                                                           | Killip 1938                         |
| <i>Passiflora capsularis</i> L.                             | <10                    | Whitish-green  | Bee                     | Pollination observed by Santos Faria & Stehmann 2010                                                                                                                                                     |                                     |
| <i>Passiflora xikzod</i> J.M. MacDougal                     | 9                      | Whitish-yellow | Unknown, wasp?          | Wasp suggestion from <a href="http://www.passionflow.co.uk">www.passionflow.co.uk</a>                                                                                                                    | MacDougal 1992                      |
| <i>Passiflora truncata</i> Regel                            | <10                    | Whitish-green  | Unknown, bee?           | Pollination by insect based on color photograph at <a href="http://www.brazilplants.com/passifloraceae/passiflora-truncata.html">http://www.brazilplants.com/passifloraceae/passiflora-truncata.html</a> | Killip 1938                         |
| <i>Passiflora pitierii</i> Mast.                            | <10                    | Whitish-yellow | Unknown, bee?           | Based on color photograph at <a href="http://www.passionflow.co.uk/passiflora-ornithoura1.htm">www.passionflow.co.uk/passiflora-ornithoura1.htm</a>                                                      | Killip 1938                         |
| <i>Passiflora macrophylla</i> Spruce ex Mast.               | 1                      | Whitish-yellow | Unknown, bee?           | Based on color photograph at <a href="http://www.tropicalfruitforum.com/index.php?topic=4268.0">www.tropicalfruitforum.com/index.php?topic=4268.0</a>                                                    | Killip 1938                         |
| <i>Passiflora coccinea</i> Abul.                            | 13                     | Red            | Hummingbird             | Pollination by hummingbirds observed by Fischer & Leal 2006                                                                                                                                              | Killip 1938                         |
| <i>Passiflora vitifolia</i> Kunth                           | 18                     | Red            | Hummingbird             | Pollination by hummingbirds observed by Snow, A (1982)                                                                                                                                                   | Killip 1938                         |
| <i>Passiflora edulis</i> Sims                               | <10                    | Whitish-purple | Carpenter bees          | Observed by Ruggiero, Banzatto & Lam-Sánchez 1976                                                                                                                                                        | Killip 1938                         |
