# Supplementary material
Source: PubMed Central journal article supplement (PMC4213610)

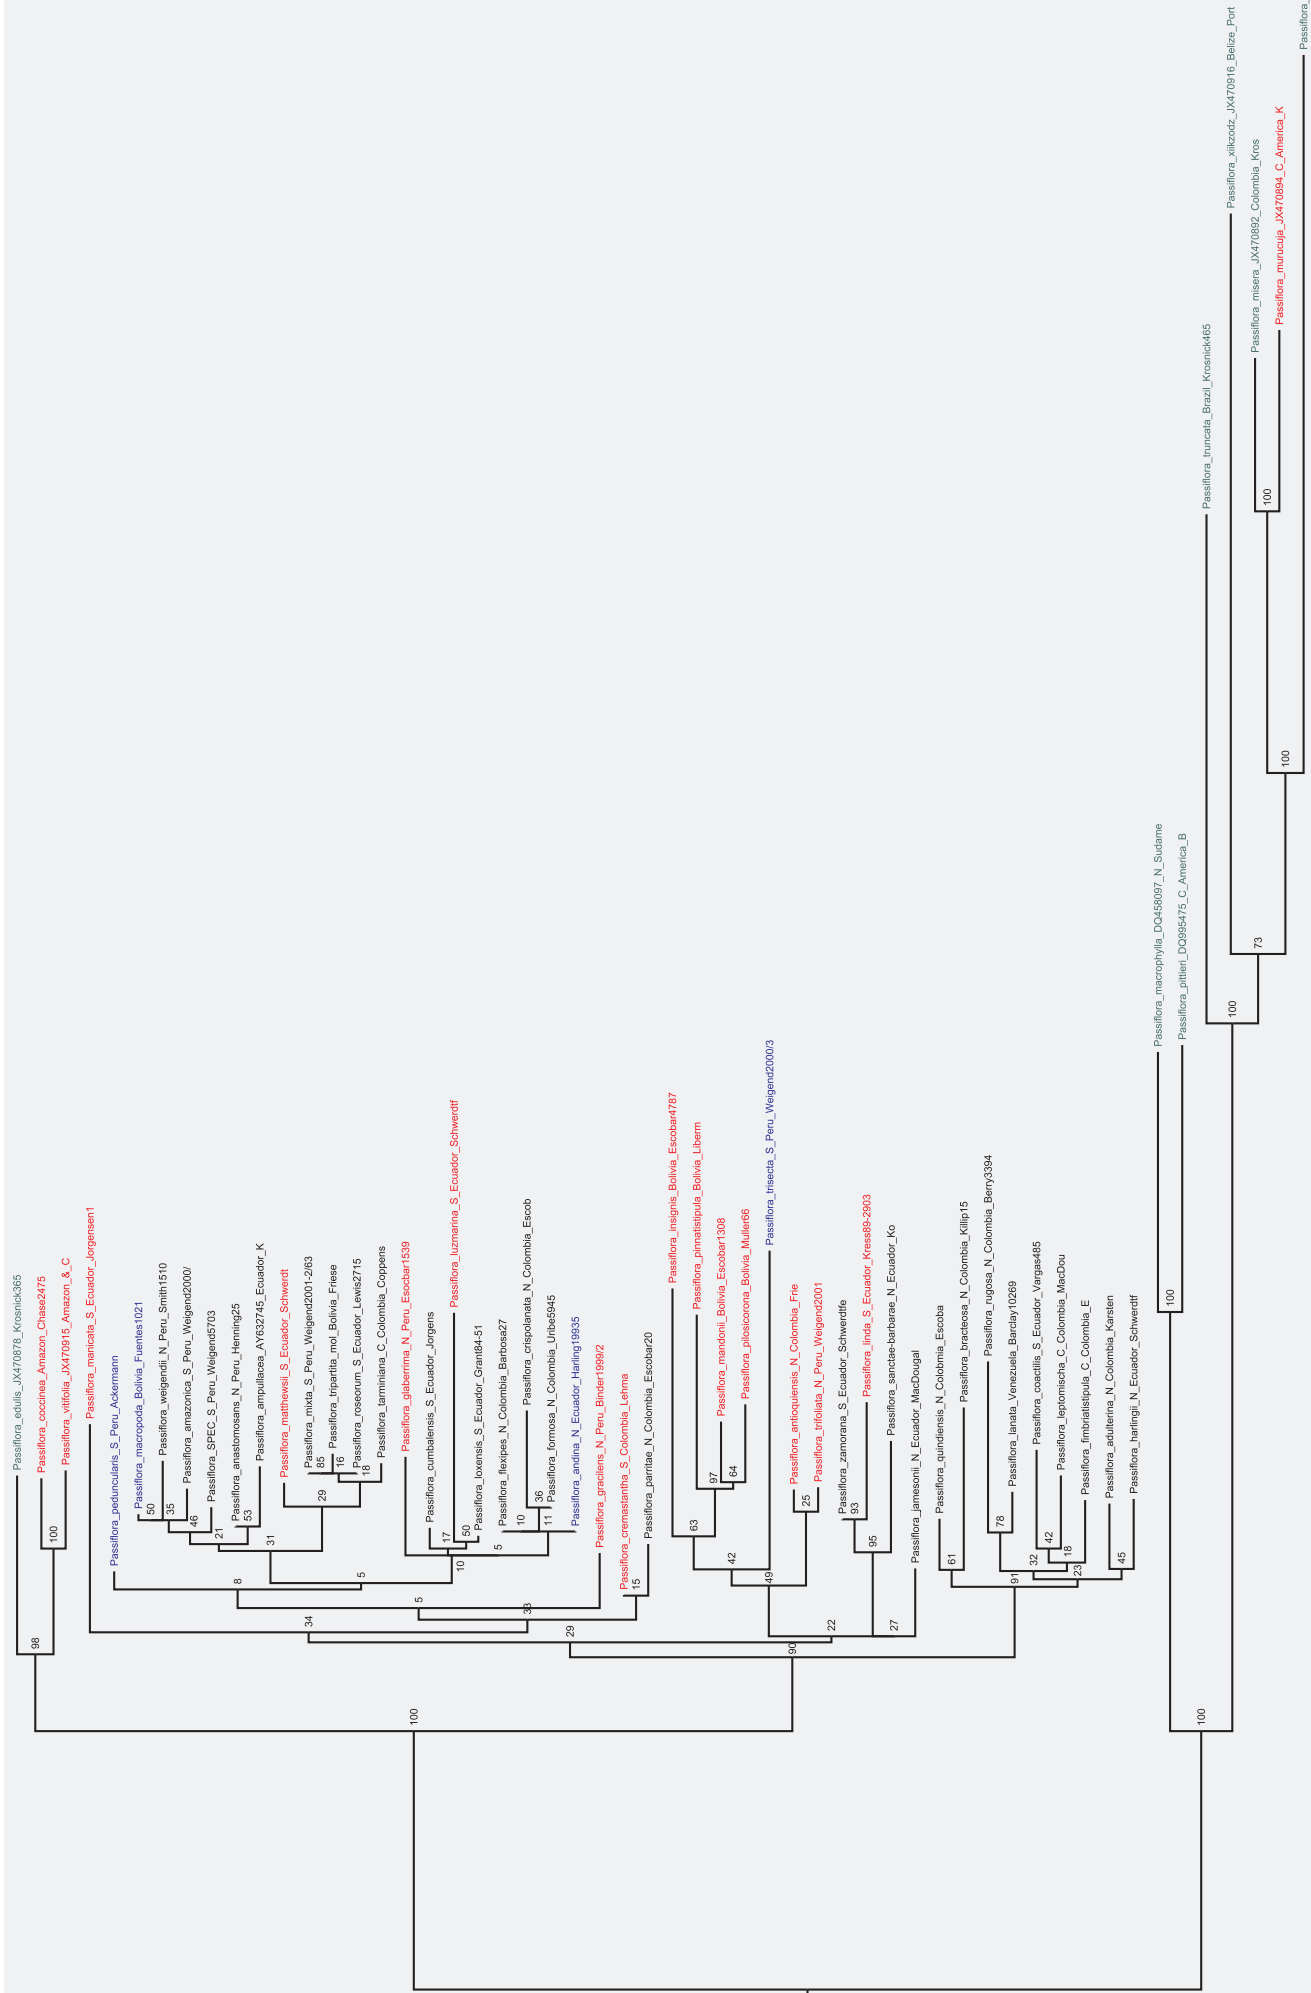

Supplement: rspb20140888supp1.pdf [file rspb20140888supp1.pdf]

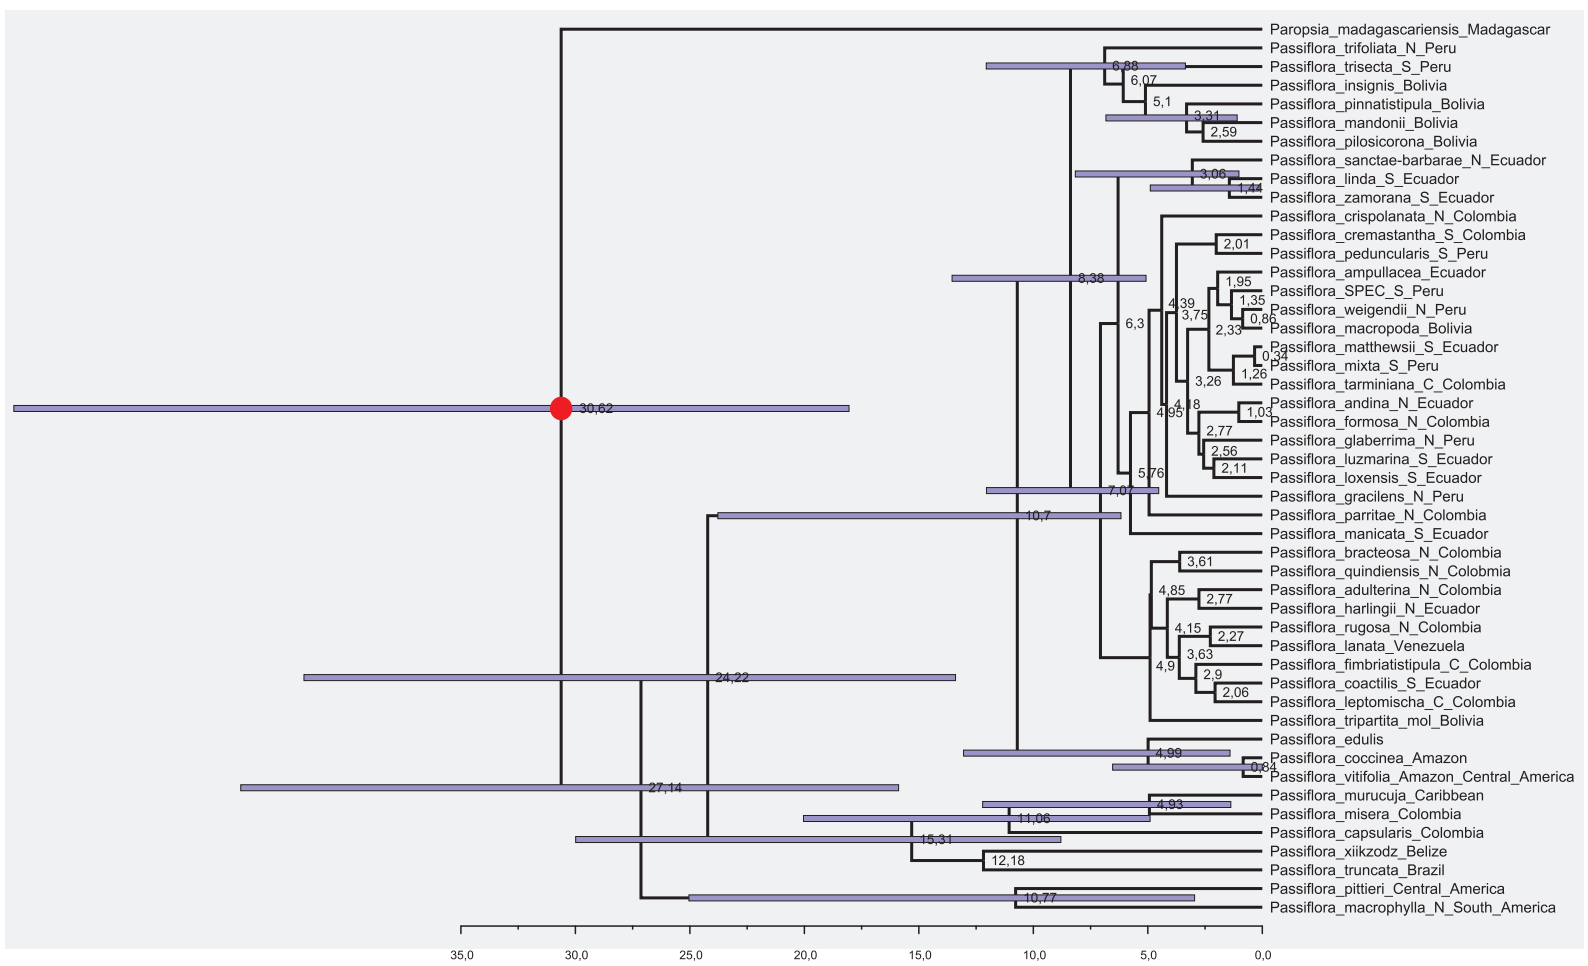

Supplement: rspb20140888supp2.pdf [file rspb20140888supp2.pdf]

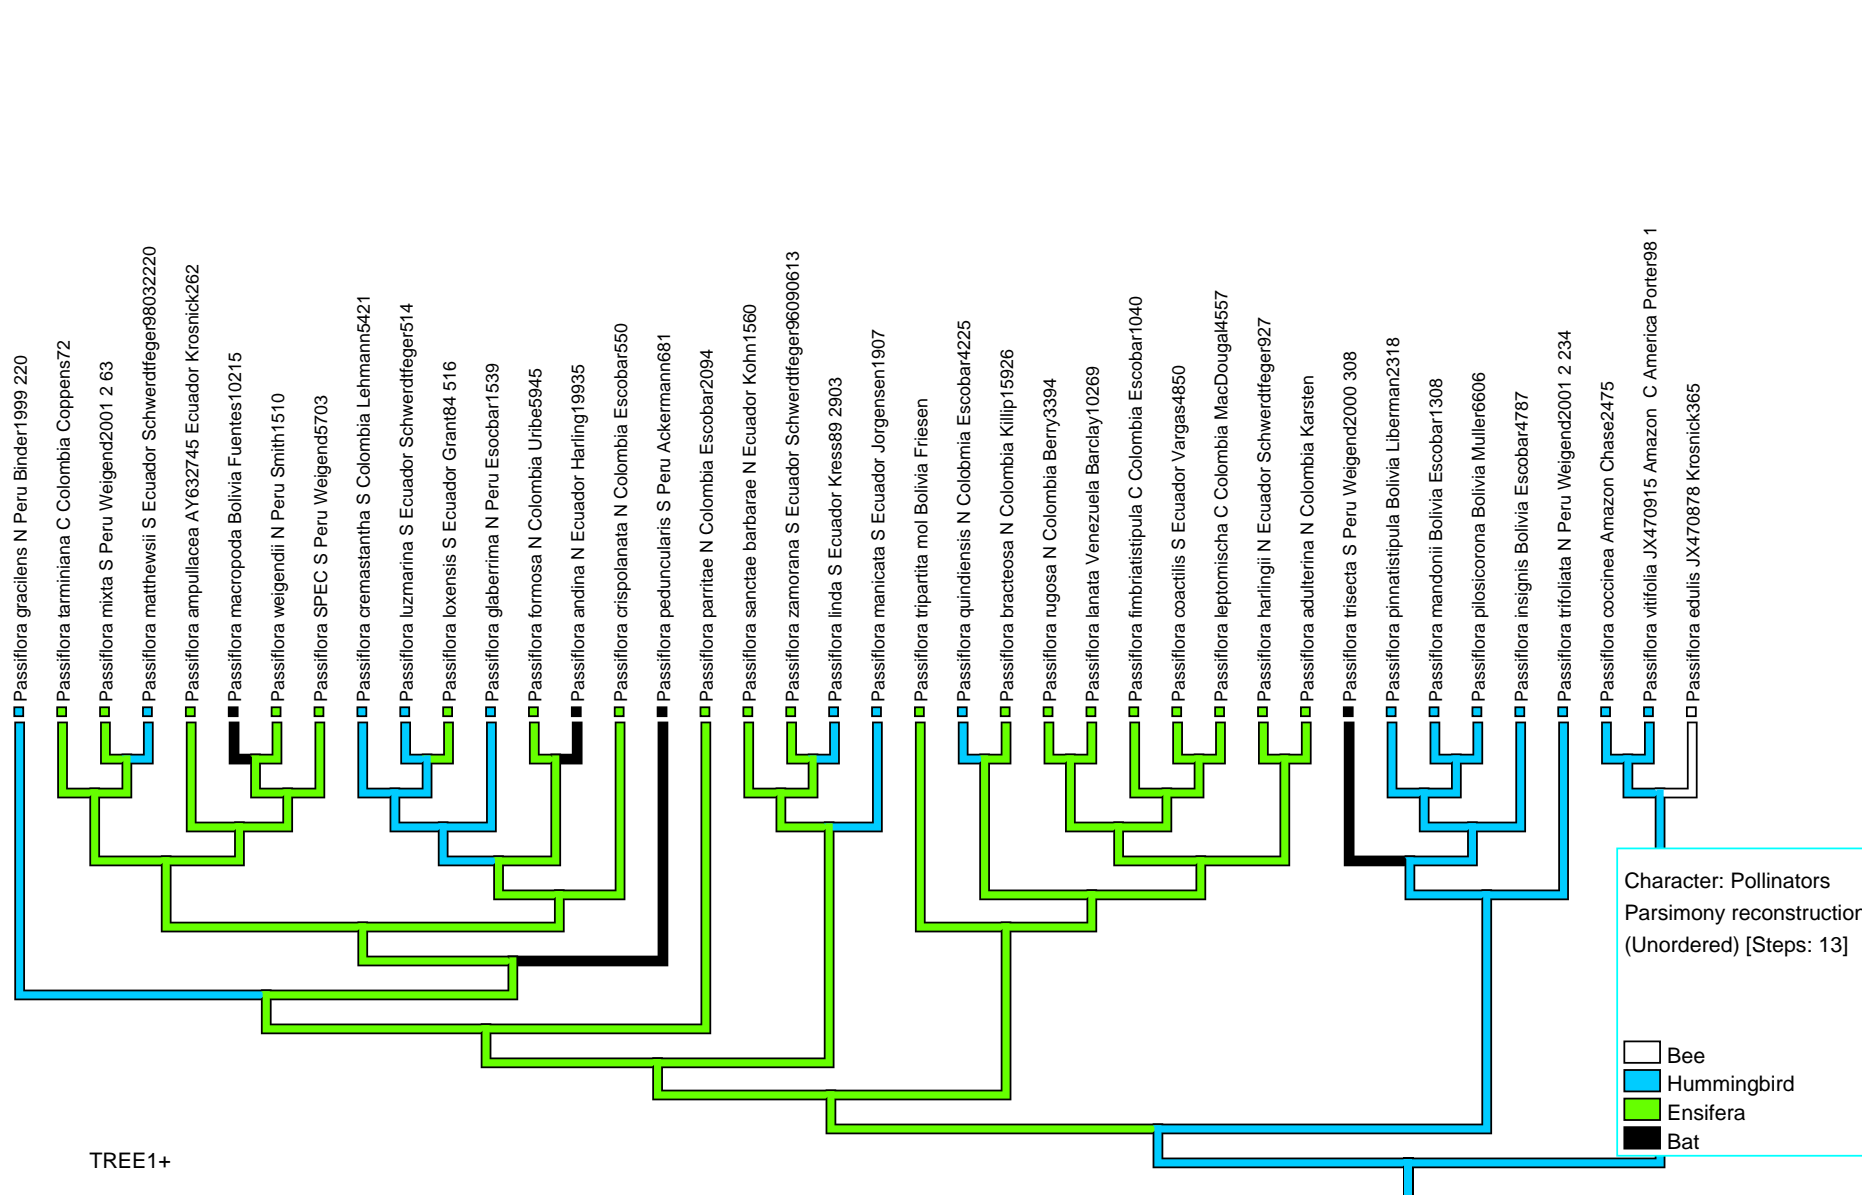

Supplement: rspb20140888supp3.pdf [file rspb20140888supp3.pdf]

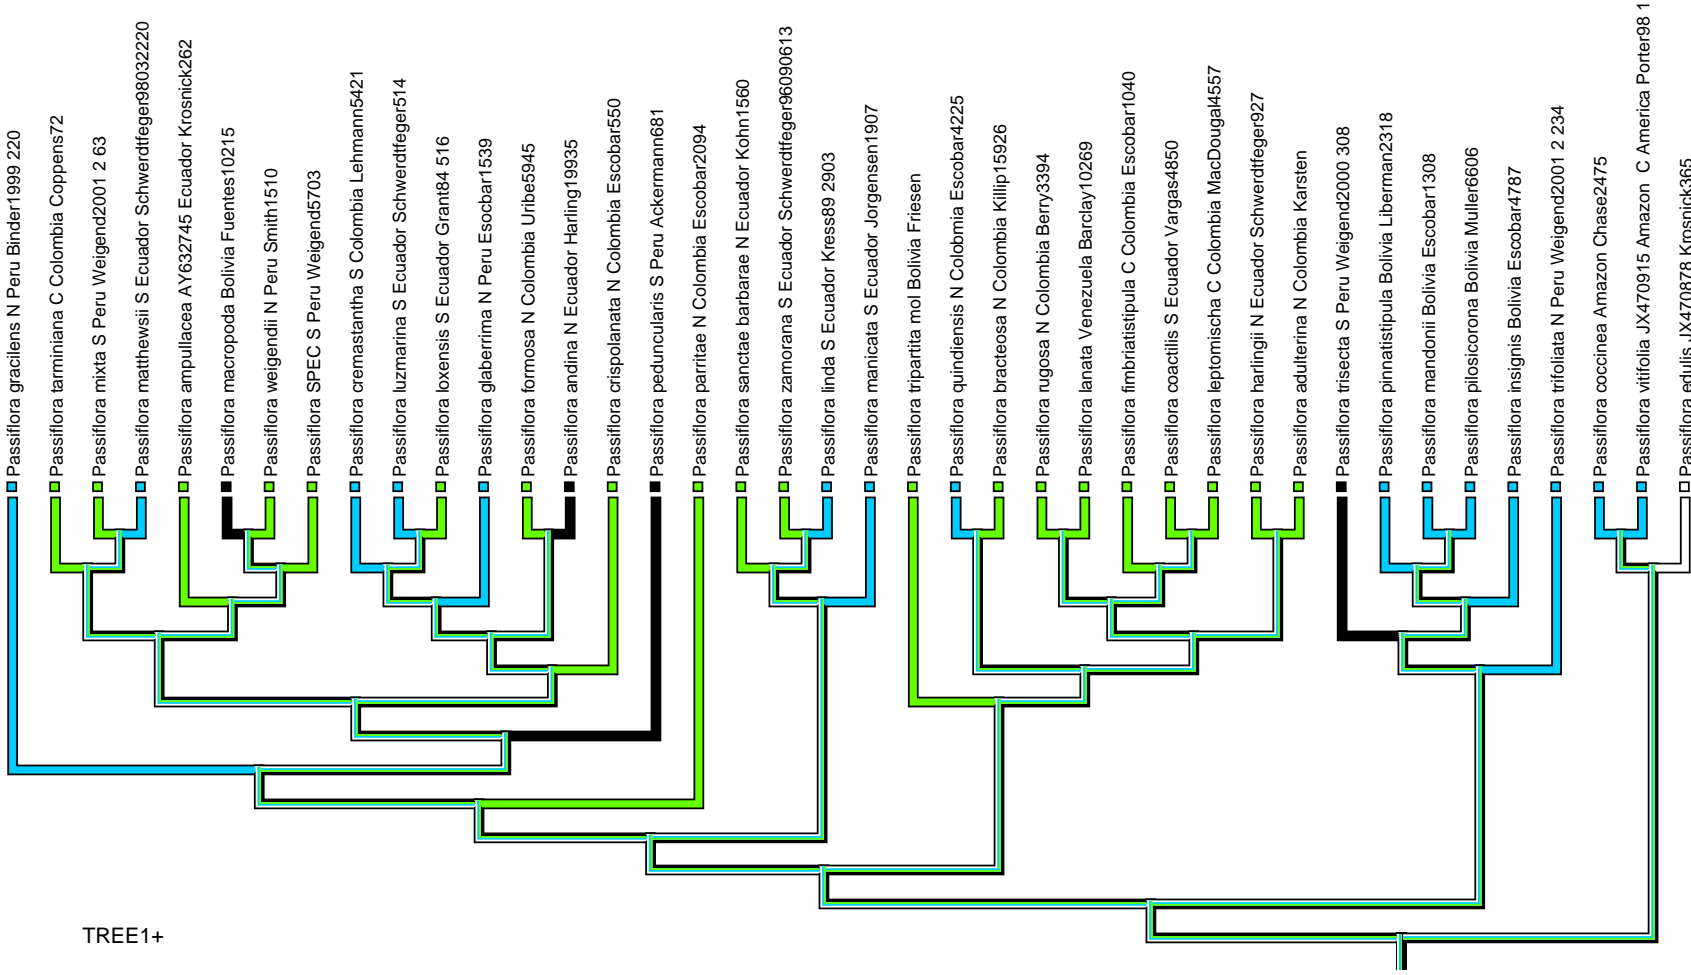

Supplement: rspb20140888supp4.pdf [file rspb20140888supp4.pdf]
